# Supplementary material for: Lentil Cultivar Evaluation in Diverse Organic Mediterranean Environments
Source: MDPI journal article supplement (doi:10.3390/agronomy14040790), 2024-04-11
Supplement: s1 [file s1]

**Table S1.** Correlation coefficients among seed yield in kg ha<sup>-1</sup> (SY), seed loss percentage (SL), yield loss in t ha<sup>-1</sup> (YL), number of pods per plant (PP), plant height in cm (PH), thousand seed weight in g (1000SW), cooking time in min. (CT) and crude protein percentage (CP).

|           | <b>SY</b> | <b>SL</b> | <b>YL</b> | <b>PP</b> | <b>PH</b> | <b>1000SW</b> | <b>CT</b> |
|-----------|-----------|-----------|-----------|-----------|-----------|---------------|-----------|
| SL        | -0.30     |           |           |           |           |               |           |
| SYL(t/ha) | -0.30     | +         |           |           |           |               |           |
| PP        | 0.22      | -0.20     | -0.10     |           |           |               |           |
| PH        | 0.24      | 0.30      | 0.25      | -0.10     |           |               |           |
| 1000SW    | 0.19      | -0.20     | -0.10     | 0.11      | 0.10      |               |           |
| CT        | -0.20     | -0.10     | -0.10     | 0.06      | -0.30     | 0.24          |           |
| CP        | 0.02      | 0.59**    | 0.53**    | -0.40     | 0.39      | -0.30         | -0.30     |

\*\* significant at  $p < 0.01$  level of probability, (n = 10), \*excluded because of the autocorrelation
